# Supplementary material for: Incremental Analysis Update (IAU) in the Model for Prediction Across Scales coupled with the Joint Effort for Data assimilation Integration (MPAS-JEDI 2.0.0)
Source: Copernicus journal article supplement (doi:10.5194/egusphere-2023-2299), 2023-11-13
Supplement: Supplementary file [file egusphere-2023-2299-AC2-supplement.pdf]

=====  
Response to anonymous referee #1:

Citation: <https://doi.org/10.5194/egusphere-2023-2299-RC1>

Thank you very much for your kind review. We believe that your comments have greatly improved the clarity of our draft. Regarding the last two scientific questions, we would like to remind you that this article was submitted to the manuscript type of “Development and technical papers” ([https://www.geoscientific-model-development.net/about/manuscript\\_types.html](https://www.geoscientific-model-development.net/about/manuscript_types.html)). Hence, we focused on our new implementation, demonstrating its successful development. We’d appreciate your understanding and support in letting us stay focused. Please find our point-by-point response to your valuable comments below. All our responses are marked in blue.

This manuscript introduced the three-dimensional IAU implemented in the MPAS-JEDI 2.0.0. Previous studies have shown that IAU can effectively remedy the imbalance caused by intermittent data assimilation. It is worthwhile to investigate the performances and potential issues of IAU for a global model with varying horizontal meshes, which would provide guidance for future seamless predictions. The manuscript is pleasant to read. Please see my specific comments as below.

l58-60, this sentence needs be clarified. What’s the difference between full fields and prognostic variables? Are the prognostic variables subsets of the full fields? If yes, why transform to the prognostic variables imposes more imbalances than that to full fields?

- ⇒ The reviewer seems to misinterpret the statement in L58-59 “The recent version of MPAS-JEDI is updated to transform analysis increments to the increments of the model’s prognostic variables instead of the full fields”. Here, we meant updating the increments ( $\delta v$ ) rather than the full values ( $v$ ) for each prognostic variable, not differentiating full vs. prognostic variables.
- ⇒ But to improve the clarity, we’ve now updated the statement as “The recent version of MPAS- JEDI is updated to transform analysis increments to the increments of the model’s prognostic variables (instead of their full fields), as stated in Guerrette et al. (2023b).”
- ⇒ Also, in new L115-121, we added “As defined in Eq. (2), the MPAS model only predicts 2-D  $\tilde{\rho}_d$ ,  $\theta_m$ ,  $u_e$ ,  $w$ , and hydrometeors in mixing ratios. In other words, none of the analysis variables are prognostic, meaning that once their increments ( $\delta v = v^a - v^b$ , where  $v^a$  and  $v^b$  stand for the analysis and background for the variable  $v$ , respectively) are computed through minimization, they should be transformed to the prognostic variables for model integration. To reduce potential errors resulting from approximations such as hydrostatic balance and the equation of state, variable transformations are only applied to the increments ( $\delta v$ ) rather than the full analysis fields ( $v^a$ ), keeping prior states ( $v^b$ ) as nonhydrostatic forecasts from the previous cycle.”

l62-64, it would be nice to add some references for the imbalances mentioned here.

- ⇒ Please note that references were already made for IAU as a way to identify and address imbalances in L29-32. Also, reference to Ha et al. (2017) was also made in L40-42 for

imbalances with EnKF in MPAS-DART. To the best of our knowledge, this manuscript is the first of its kind to discuss such imbalances in the MPAS-JEDI system, using the incremental approach within a pure 3DEnVar algorithm. Therefore, we hope this study can serve as another reference for future studies on the imbalances associated with DA. No changes are made.

l118, what is phi?

- ⇒ Sorry for the confusion and thanks for catching this up! It is just representative of a model variable.
- ⇒ The whole paragraph is now updated (in new L115-121) and uses  $v$  to make it consistent with the expression in L117 (e.g.,  $\delta v = v^a - v^b$ ).

l112-122, since the transformation from grid point to mesh grid is not linear, it is not equivalent to transform the increment or the analysis. For the MPAS-IAU, is the native increment or the analysis used as the input for MPAS simulations?

- ⇒ It is unclear what the reviewer meant by the transformation from grid point to mesh grid, since there was no such a thing here. Presumably, there might be a misunderstanding regarding our variable transformations. The reviewer previously asked about L58-60, expressing similar confusion. It is noted that we are always working with the model's native (e.g., unstructured) mesh and the variable transformations are unrelated with the mesh. Just to be clear, we are only converting one variable to another located on the same mesh location and variables are always treated in the native mesh. Since the mesh info for the variables is already described in L114-116, no more changes.

l127-130, how much the error could be introduced by this hydrostatic assumption?

- ⇒ Errors would depend on various factors such as horizontal and vertical mesh resolutions and flow regimes in the simulation. Convective storms, for instance, could be highly nonlinear and nonhydrostatic, but the errors arising from variable transformations alone are not yet quantified. As MPAS-JEDI is being actively developed for convective-scale DA, the potential issue could be examined in future studies. No changes.

l176, please spell 4DIAU out at the first time.

- ⇒ Thank you. The statement is now updated as "Although a simple 3DIAU is currently implemented with constant forcing, it could be extended for a four-dimensional IAU (4DIAU) with varying weights over the IAU time window."

l173-177, it is interesting to know the IAU terms for hydrometer variables. Are they the same as Eq. 12?

- ⇒ As stated in L94-95, water vapor mixing ratio ( $q_v$ ) is part of hydrometeors. The tendency expressed for  $q_v$  in Eq. (10) can be applied to any  $q_j$ . No changes.

l195-210, if a restart file is used for cycling, how the analysis and analysis tendency are computed for multiple time slices?

- ⇒ The frequency of DA is unrelated to whether a restart mode is used because DA is performed only once at the analysis time, regardless of the restart mode. The difference between a restart and a cold start mode only lies in the treatment of tendencies within the model and does not affect the analysis process. While a cold start mode initializes all the tendencies (as zeros) at the initial (or analysis) time, a restart mode carries them over from previous forecasts (e.g. nonzeros) for model integration. Also, as stated in L137-141, because all the prognostic variables are handled in flux form inside the model, they should be recoupled after data assimilation, but the recoupling also occurs only once at the analysis time, regardless of the restart mode (and even with IAU). No changes.

I229, what is YAML?

- ⇒ As defined in <https://yaml.org/>, YAML is a human-friendly data serialization language for all programming languages, which is basically an ascii file with its own writing style.
- ⇒ We've now added "(YAML is an ascii data format; <https://yaml.org>, last access: 27 Dec 2023)" in new L235. Thank you.

I225-235, is UFO an independent module outside of minimization or filtering? If so, how the bias correction (VarBC) is performed for radiance observations? How's the inter-channel correlations handled by the UFO?

- ⇒ These questions are irrelevant to our IAU work. For general information on VarBC in UFO, please refer to <https://jointcenterforsatellitedataassimilation-jedi-docs.readthedocs-hosted.com/en/latest/inside/jedi-components/ufo/varbc.html>. No changes.

I241, it is interesting to know whether the IAU functions well with inhomogeneous grids?

- ⇒ As for the IAU benefits on a variable-resolution mesh, Ha et al. (2017) reported that forecast errors were significantly reduced over the tropics (with both resolution-transition and high-resolution parts included). But it was not clear if the benefits were mainly tied to the mesh configuration or more affected by model errors or simulated flow regimes dominant over the region. No changes.

Section 4, it would be more convincing to have the statistical significance of the error differences between CTRL and IAU. It would be nice to have the verifications of CTRL and IAU relative to ECMWF or NCEP analysis, especially for water vapor.

- ⇒ Thank you for your suggestion. As stated in the last paragraph of Sections 1 and 4 (especially L71-74: "As a technical paper, ~"), however, this study focuses on our new implementation as a technical development paper and does not discuss the comprehensive characteristics of the system. As such, the results are only presented as a proof of concept, demonstrating the successful development. We leave a comprehensive analysis for future studies.

I280-285, please give some explanations for the error differences between the CTRL and IAU. Why IAU helps over the tropics but not over the polar regions. Is it possible this is due to the moving systems over the tropics (Ge et al. 2023 JAMES)?

- ⇒ Same as above. Fig. 7 is not meant for a thorough investigation or scientific discussions.

Since the IAU has a time filtering feature (L35), it might have played a positive role in simulating low-frequency modes dominant over the tropics. But given that the GFS analysis (used for the verification in Fig.7) also suffers from its own errors, we did not intend to discuss the errors *per se*. The figure was mainly shown to introduce post-processing capabilities in the system (L290-298). No changes.
